# Supplementary material for: Extended metAFLP approach in studies of tissue culture induced variation (TCIV) in triticale
Source: PubMed Central journal article supplement (PMC4162973; doi:10.1007/s11032-014-0079-2), 2014-05-07

**Extended metAFLP approach in studies of the tissue culture induced variation (TCIV)  
in case of triticale**

**Molecular Breeding**

Joanna Machczyńska<sup>1</sup>, Renata Orłowska<sup>1</sup>, Janusz Zimny<sup>2</sup>, Piotr Tomasz Bednarek\*<sup>1</sup>

<sup>1</sup>Department of Plant Physiology and Biochemistry

<sup>2</sup>Department of Plant Biotechnology and Cytogenetics

Plant Breeding and Acclimatization Institute - National Research Institute, 05-870 Błonie,  
Radzików, Poland

\*Corresponding author: Piotr Tomasz Bednarek - p.bednarek@ihar.edu.pl

**Online Resource 1** Schematic illustration of the ways plant materials were evaluated. RA, RM, RE – regenerants derived from anther, shed-microspore and immature zygotic embryo cultures, respectively.

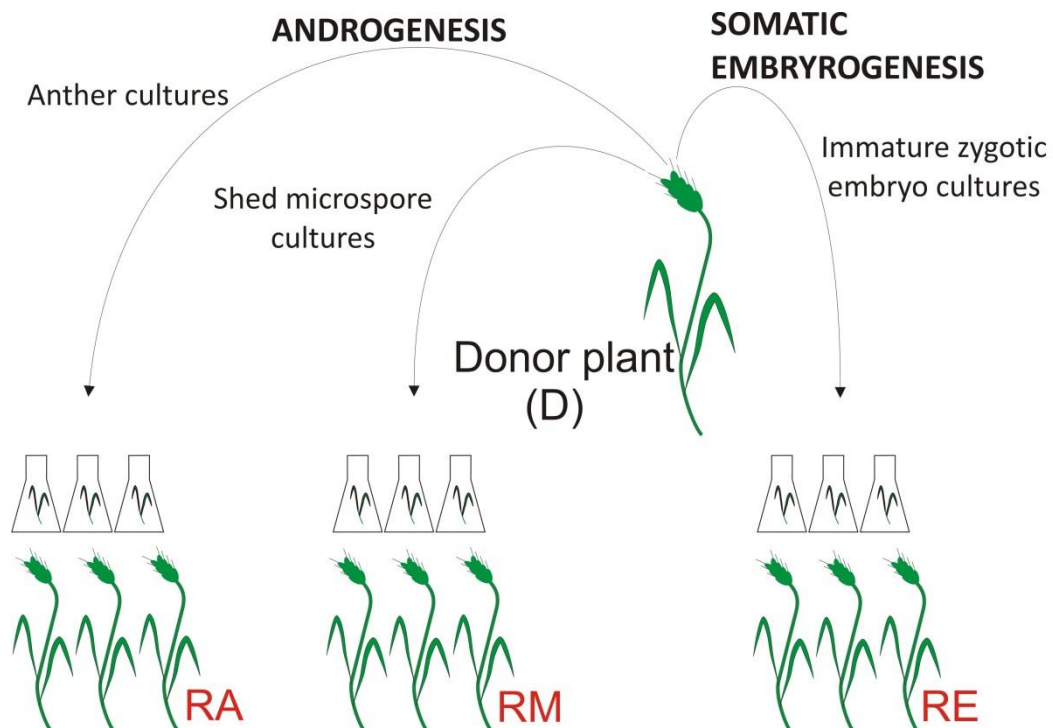

Supplement: 11032_2014_79_MOESM1_ESM.pdf [file 11032_2014_79_MOESM1_ESM.pdf]
