# Supplementary material for: Extended metAFLP approach in studies of tissue culture induced variation (TCIV) in triticale
Source: PubMed Central journal article supplement (PMC4162973; doi:10.1007/s11032-014-0079-2), 2014-05-07
Supplement: 11032_2014_79_MOESM2_ESM.pdf [file 11032_2014_79_MOESM2_ESM.pdf]

**Extended metAFLP approach in studies of the tissue culture induced variation (TCIV)  
in case of triticale**

**Molecular Breeding**

Joanna Machczyńska<sup>1</sup>, Renata Orłowska<sup>1</sup>, Janusz Zimny<sup>2</sup>, Piotr Tomasz Bednarek\*<sup>1</sup>

<sup>1</sup>Department of Plant Physiology and Biochemistry

<sup>2</sup>Department of Plant Biotechnology and Cytogenetics

Plant Breeding and Acclimatization Institute - National Research Institute, 05-870 Błonie,  
Radzików, Poland

\*Corresponding author: Piotr Tomasz Bednarek - p.bednarek@ihar.edu.pl

**Online Resource 2** Oligonucleotides exploited for metAFLP in studies on triticale cv. Bogo.

| <b>MetAFLP oligomer</b>                                  | <b>Sequence 5'→ 3'</b> |
|----------------------------------------------------------|------------------------|
| Adapter1 Acc65I                                          | CTCGTAGCATGCGTACA      |
| Adapter2 Acc65I                                          | GTACTGTACGCATGCTAC     |
| Adapter1 KpnI                                            | CTCGTAGCATGCGTACAGTAC  |
| Adapter2 KpnI                                            | TGTACGCATGCTAC         |
| Adapter1 Mse                                             | TACTCAGGACTCATC        |
| Adapter2 Mse                                             | GAGTCCTGAGTAGCAG       |
| <b>Preselective primers</b>                              |                        |
| Acc65I/KpnI                                              | GCGATGCGTACAGTACC      |
| MseI                                                     | GATGAGTCCTGAGTAAC      |
| <b>Labeled <sup>32</sup>P selective oligonucleotides</b> |                        |

---

|                                   |                        |
|-----------------------------------|------------------------|
| CpG GCA                           | CATGCGTACAGTACCGCA     |
| CpG GGC                           | CATGCGTACAGTACCGGC     |
| CpG GAC                           | CATGCGTACAGTACCGAC     |
| CpG ACG                           | CATGCGTACAGTACCACG     |
| CpG TCG                           | CATGCGTACAGTACCTCG     |
| CpXpG ATG                         | CATGCGTACAGTACCATG     |
| CpXpG (A/T)GG                     | CATGCGTACAGTACC(A/T)GG |
| CpXpG AGG                         | CATGCGTACAGTACCAGG     |
| CpXpG AGA                         | CATGCGTACAGTACCAGA     |
| CpXpG AGC                         | CATGCGTACAGTACCAGC     |
| CpXpG TGC                         | CATGCGTACAGTACCTGC     |
| CpXpG TTG                         | CATGCGTACAGTACCTTG     |
| CpXpX ATT                         | CATGCGTACAGTACCATT     |
| CpXpX TAA                         | CATGCGTACAGTACCTAA     |
| <b>Selective oligonucleotides</b> |                        |
| M CTC                             | GATGAGTCCTGAGTAACTC    |
| M CTG                             | GATGAGTCCTGAGTAACTG    |
| M CTA                             | GATGAGTCCTGAGTAACTA    |
| M CTT                             | GATGAGTCCTGAGTAACTT    |
| M CAC                             | GATGAGTCCTGAGTAACAC    |
| M CAG                             | GATGAGTCCTGAGTAACAG    |
| M CAT                             | GATGAGTCCTGAGTAACAT    |
| M CAA                             | GATGAGTCCTGAGTAACAA    |
| M CGC                             | GATGAGTCCTGAGTAACGC    |
| M CGT                             | GATGAGTCCTGAGTAACGT    |

---

---

M CCG

GATGAGTCCTGAGTAACCG

M CCT

GATGAGTCCTGAGTAACCT

---
