# Supplementary material for: Extended metAFLP approach in studies of tissue culture induced variation (TCIV) in triticale
Source: PubMed Central journal article supplement (PMC4162973; doi:10.1007/s11032-014-0079-2), 2014-05-07
Supplement: 11032_2014_79_MOESM3_ESM.pdf [file 11032_2014_79_MOESM3_ESM.pdf]

**Extended metAFLP approach in studies of the tissue culture induced variation (TCIV)  
in case of triticale**

**Molecular Breeding**

Joanna Machczyńska<sup>1</sup>, Renata Orłowska<sup>1</sup>, Janusz Zimny<sup>2</sup>, Piotr Tomasz Bednarek\*<sup>1</sup>

<sup>1</sup>Department of Plant Physiology and Biochemistry

<sup>2</sup>Department of Plant Biotechnology and Cytogenetics

Plant Breeding and Acclimatization Institute - National Research Institute, 05-870 Błonie,  
Radzików, Poland

\*Corresponding author: Piotr Tomasz Bednarek - p.bednarek@ihar.edu.pl

**Online Resource 3** Illustration of the different specificity of the *Acc65I* and *KpnI* isoschizomers. Both endonucleases recognize the same DNA sequence (indicated in green and red), however, methylated site cannot be digested by *Acc65I* while can be hydrolyzed by *KpnI* one. When the site is not methylated both enzymes may cut the DNA releasing different overlapping ends.

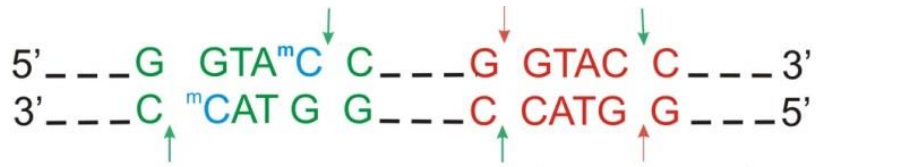

*KpnI*

*Acc65I*

*Acc65I*

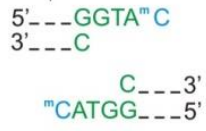

missing  
fragment

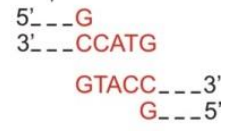

*KpnI*

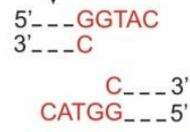

- ↓ *KpnI* restriction site
- ↓ *Acc65I* restriction site
- ↓ DNA fragments after isoschizomers digestion
