# Supplementary material for: Extended metAFLP approach in studies of tissue culture induced variation (TCIV) in triticale
Source: PubMed Central journal article supplement (PMC4162973; doi:10.1007/s11032-014-0079-2), 2014-05-07
Supplement: 11032_2014_79_MOESM6_ESM.pdf [file 11032_2014_79_MOESM6_ESM.pdf]

**Extended metAFLP approach in studies of the tissue culture induced variation (TCIV)  
in case of triticale**

**Molecular Breeding**

Joanna Machczyńska<sup>1</sup>, Renata Orłowska<sup>1</sup>, Janusz Zimny<sup>2</sup>, Piotr Tomasz Bednarek\*<sup>1</sup>

<sup>1</sup>Department of Plant Physiology and Biochemistry

<sup>2</sup>Department of Plant Biotechnology and Cytogenetics

Plant Breeding and Acclimatization Institute - National Research Institute, 05-870 Błonie,  
Radzików, Poland

\*Corresponding author: Piotr Tomasz Bednarek - p.bednarek@ihar.edu.pl

**Online Resource 6** Arrangement of selective primer combinations and the number of fragments amplified. TNAF – total number of amplified fragments; PFA – number of polymorphic fragments in the *Acc65I/MseI* platform; PFK – number of polymorphic fragments in the *KpnI/MseI* platform; MFA – number of monomorphic fragments in the *Acc65I/MseI* platform; MFK – number of monomorphic fragments in *KpnI/MseI* platform.

| <b>Selective primer combination</b> | <b>TNAF</b> | <b>PFA</b> | <b>PFK</b> | <b>MFA</b> | <b>MFK</b> |
|-------------------------------------|-------------|------------|------------|------------|------------|
| <b>CpG GCA/M CGC</b>                | 28          | 11         | 6          | 17         | 22         |
| <b>CpG GGC/M CTG</b>                | 32          | 21         | 22         | 11         | 10         |
| <b>CpG GAC/M CAA</b>                | 42          | 25         | 21         | 17         | 21         |
| <b>CpG ACG/M CAT</b>                | 40          | 12         | 7          | 28         | 33         |
| <b>CpG TCG/M CGT</b>                | 47          | 34         | 29         | 13         | 18         |
| <b>CpXpG ATG/M CTC</b>              | 43          | 15         | 15         | 28         | 28         |

---

|                             |            |            |            |            |            |
|-----------------------------|------------|------------|------------|------------|------------|
| <b>CpXpG (A/T) GG/M CCT</b> | 48         | 16         | 11         | 32         | 37         |
| <b>CpXpG AGG/M CAG</b>      | 33         | 15         | 18         | 18         | 15         |
| <b>CpXpG AGA/M CAA</b>      | 51         | 29         | 26         | 22         | 25         |
| <b>CpXpG AGC/M CTA</b>      | 37         | 18         | 13         | 19         | 24         |
| <b>CpXpG TGC/M CCG</b>      | 43         | 28         | 24         | 15         | 19         |
| <b>CpXpG TTG/M CTT</b>      | 47         | 18         | 22         | 29         | 25         |
| <b>CpXpX ATT/M CAC</b>      | 49         | 33         | 34         | 16         | 15         |
| <b>CpXpX TAA/M CGT</b>      | 44         | 35         | 30         | 9          | 14         |
| <b>Total</b>                | <b>584</b> | <b>310</b> | <b>278</b> | <b>274</b> | <b>306</b> |

---
