# Supplementary material for: Extended metAFLP approach in studies of tissue culture induced variation (TCIV) in triticale
Source: PubMed Central journal article supplement (PMC4162973; doi:10.1007/s11032-014-0079-2), 2014-05-07
Supplement: 11032_2014_79_MOESM7_ESM.pdf [file 11032_2014_79_MOESM7_ESM.pdf]

**Extended metAFLP approach in studies of the tissue culture induced variation (TCIV)  
in case of triticale**

**Molecular Breeding**

Joanna Machczyńska<sup>1</sup>, Renata Orłowska<sup>1</sup>, Janusz Zimny<sup>2</sup>, Piotr Tomasz Bednarek\*<sup>1</sup>

<sup>1</sup>Department of Plant Physiology and Biochemistry

<sup>2</sup>Department of Plant Biotechnology and Cytogenetics

Plant Breeding and Acclimatization Institute - National Research Institute, 05-870 Błonie,  
Radzików, Poland

\*Corresponding author: Piotr Tomasz Bednarek - p.bednarek@ihar.edu.pl

**Online Resource 7** Arrangement of events represented by individual 4-digit codes for regenerants derived via anther (RA), shed-microspore (RM), immature zygotic embryo cultures (RE) and for all regenerants taken together ( $\Sigma$ ).

| <b>4-digit code</b> | <b>RA</b> | <b>RM</b> | <b>RE</b> | <b><math>\Sigma</math></b> |
|---------------------|-----------|-----------|-----------|----------------------------|
| <b>0000</b>         | 1046      | 1225      | 1106      | 3377                       |
| <b>0001</b>         | 182       | 204       | 165       | 551                        |
| <b>0010</b>         | 266       | 344       | 316       | 926                        |
| <b>0011</b>         | 429       | 563       | 349       | 1341                       |
| <b>0100</b>         | 119       | 199       | 73        | 391                        |
| <b>0101</b>         | 228       | 262       | 294       | 784                        |
| <b>0110</b>         | 66        | 92        | 31        | 189                        |
| <b>0111</b>         | 539       | 561       | 656       | 1756                       |

---

|             |       |       |       |       |
|-------------|-------|-------|-------|-------|
| <b>1000</b> | 192   | 220   | 238   | 650   |
| <b>1001</b> | 43    | 83    | 50    | 176   |
| <b>1010</b> | 151   | 238   | 167   | 556   |
| <b>1011</b> | 339   | 491   | 378   | 1208  |
| <b>1100</b> | 168   | 217   | 117   | 502   |
| <b>1101</b> | 272   | 290   | 297   | 859   |
| <b>1110</b> | 275   | 350   | 298   | 923   |
| <b>1111</b> | 10285 | 12181 | 10649 | 33115 |

---
