# Supplementary material for: Extended metAFLP approach in studies of tissue culture induced variation (TCIV) in triticale
Source: PubMed Central journal article supplement (PMC4162973; doi:10.1007/s11032-014-0079-2), 2014-05-07
Supplement: 11032_2014_79_MOESM8_ESM.pdf [file 11032_2014_79_MOESM8_ESM.pdf]

**Extended metAFLP approach in studies of the tissue culture induced variation (TCIV)  
in case of triticale**

**Molecular Breeding**

Joanna Machczyńska<sup>1</sup>, Renata Orłowska<sup>1</sup>, Janusz Zimny<sup>2</sup>, Piotr Tomasz Bednarek\*<sup>1</sup>

<sup>1</sup>Department of Plant Physiology and Biochemistry

<sup>2</sup>Department of Plant Biotechnology and Cytogenetics

Plant Breeding and Acclimatization Institute - National Research Institute, 05-870 Błonie,  
Radzików, Poland

\*Corresponding author: Piotr Tomasz Bednarek - p.bednarek@ihar.edu.pl

**Online Resource 8** Arrangement of the *F* statistic values based on analysis of variance for variation types. Significance at  $p < 0.01$  and  $\alpha = 0.05$ . RA, RM, RE – regenerants derived from anther cultures, shed microspore cultures and immature zygotic embryo cultures, respectively.

| <b>Model</b>             | <b>RA</b>             | <b>RM</b> | <b>RE</b> | <b>All<br/>regenerants</b> |
|--------------------------|-----------------------|-----------|-----------|----------------------------|
|                          | <b><i>F</i> value</b> |           |           |                            |
| <b>SV - DMV - DNMV</b>   | 525.5                 | 435.1     | 1141      | 1572                       |
| <b>CSV- CDMV - CDNMV</b> | 554.9                 | 443.6     | 1328      | 1647                       |
