# Supplementary material for: Extended metAFLP approach in studies of tissue culture induced variation (TCIV) in triticale
Source: PubMed Central journal article supplement (PMC4162973; doi:10.1007/s11032-014-0079-2), 2014-05-07
Supplement: 11032_2014_79_MOESM9_ESM.pdf [file 11032_2014_79_MOESM9_ESM.pdf]

**Extended metAFLP approach in studies of the tissue culture induced variation (TCIV)  
in case of triticale**

**Molecular Breeding**

Joanna Machczyńska<sup>1</sup>, Renata Orłowska<sup>1</sup>, Janusz Zimny<sup>2</sup>, Piotr Tomasz Bednarek\*<sup>1</sup>

<sup>1</sup>Department of Plant Physiology and Biochemistry

<sup>2</sup>Department of Plant Biotechnology and Cytogenetics

Plant Breeding and Acclimatization Institute - National Research Institute, 05-870 Błonie,  
Radzików, Poland

\*Corresponding author: Piotr Tomasz Bednarek - p.bednarek@ihar.edu.pl

**Online Resource 9** Variation grouping based on Tukey's test. The probability level for all statistical analyses was  $p < 0.01$  and  $\alpha = 0.05$ . RA, RM, RE – regenerants derived from anther cultures, shed-microspores cultures and immature zygotic embryo cultures, respectively.

| Variation types                          |              | Tukey's grouping |           |           |                        |
|------------------------------------------|--------------|------------------|-----------|-----------|------------------------|
|                                          |              | RA               | RM        | RE        | All regenerants        |
| <b>Uncorrected for complex variation</b> | <b>SV</b>    | C                | B         | C         | C                      |
|                                          | <b>DMV</b>   | B                | A         | B         | B                      |
|                                          | <b>DNMV</b>  | A                | A         | A         | A                      |
|                                          |              | <b>RA</b>        | <b>RM</b> | <b>RE</b> | <b>All regenerants</b> |
| <b>Corrected for complex variation</b>   | <b>CSV</b>   | C                | B         | C         | C                      |
|                                          | <b>CDMV</b>  | B                | A         | B         | B                      |
|                                          | <b>CDNMV</b> | A                | A         | A         | A                      |
|                                          |              |                  |           |           |                        |
